# Supplementary material for: Local structure distortion induced by Ti dopants boosting the pseudocapacitance of RuO2-based supercapacitors
Source: Royal Society of Chemistry journal article supplement (doi:10.1039/c5nr03660g), 2015-01-01
Supplement: c5nr03660g1.pdf [file c5nr03660g1.pdf]

## Supporting Information

### **Local Structure Distortion Induced by Ti dopant Boosting the Pseudocapacitance of RuO<sub>2</sub>-Based Supercapacitors**

I-Li Chen<sup>a</sup>, Yu-Chen Wei<sup>b</sup>, Kueih-Tzu Lu<sup>a</sup>, Tsan-Yao Chen<sup>c</sup>, Chi-Chang Hu<sup>d\*</sup>, Jin-Ming Chen<sup>a\*</sup>

---

<sup>a.</sup> *National Synchrotron Radiation Research Center, Hsin-Chu 30076, Taiwan.  
E-mail: [jmchen@nsrrc.org.tw](mailto:jmchen@nsrrc.org.tw); Tel: +886-3-5780281 ext. 7115*

<sup>b.</sup> *Institute of Materials Science and Engineering, National Central University,  
Taoyuan 32001, Taiwan*

<sup>c.</sup> *Department of Engineering and System Science, National TsingHua  
University, Hsin-Chu 30013, Taiwan*

<sup>d.</sup> *Department of Chemical Engineering, National Tsing Hua University, Hsin-  
Chu 30013, Taiwan. E-mail: [cchu@che.nthu.edu.tw](mailto:cchu@che.nthu.edu.tw); Tel: +886-3-5736027*

This supporting information includes 6 figures and 1 table.

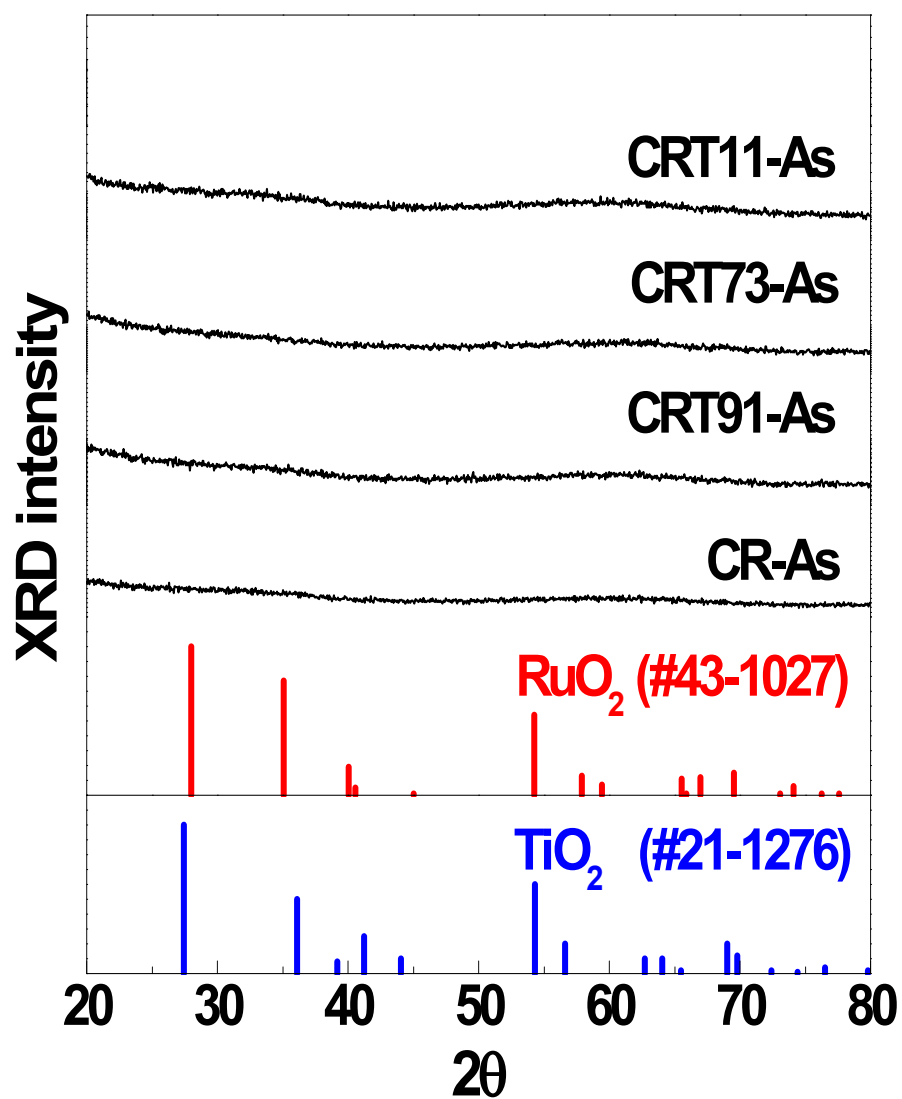

Figure S1 XRD patterns for CRT91-As, CRT73-As, and CRT55-As. The diffraction features of rutile  $\text{RuO}_2$  (JCPDS #43-1027) and  $\text{TiO}_2$  (JCPDS #21-1276) are provided for a comparison purpose.

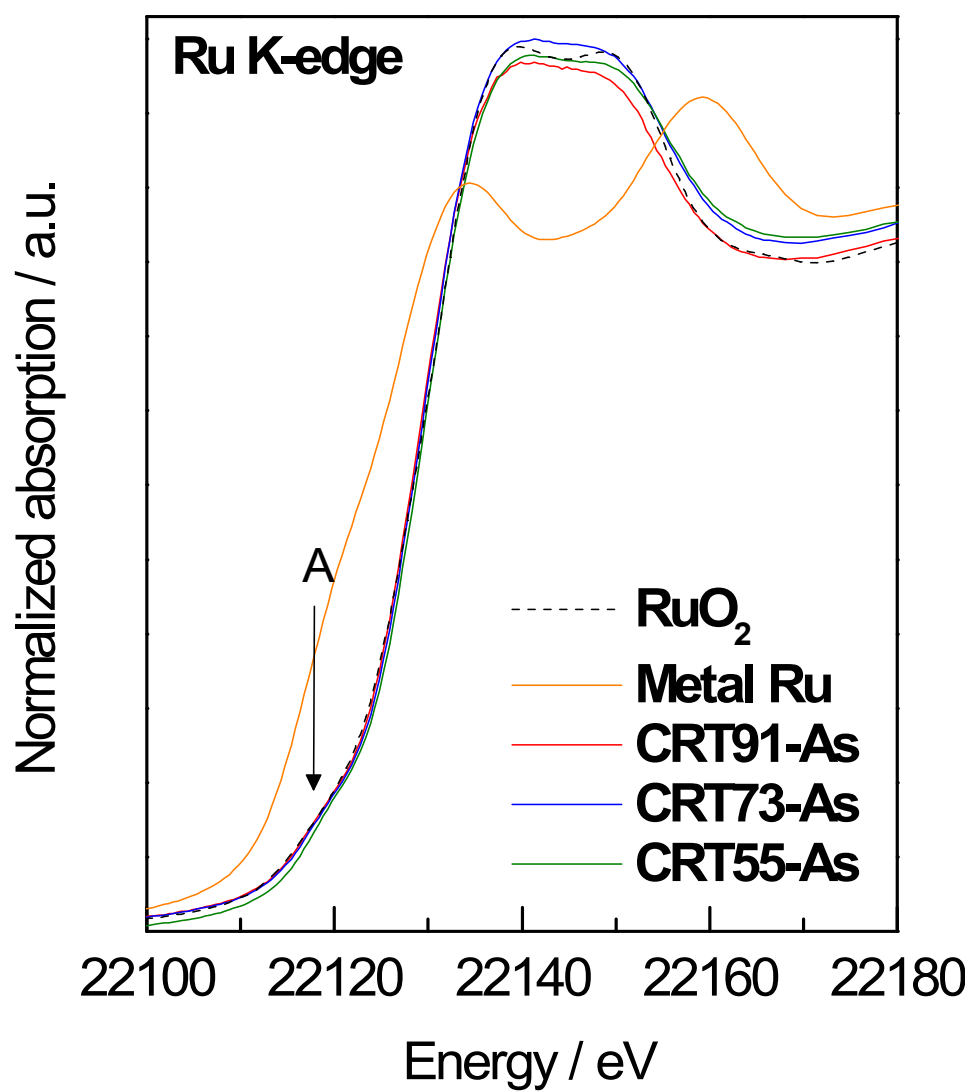

Figure S2 XANES spectra at the Ru *K*-edge for anhydrous  $\text{RuO}_2$ , metallic Ru, CRT91-As, CRT73-As, and CRT55-As. All spectra presented here are normalized to the same scale for comparison.

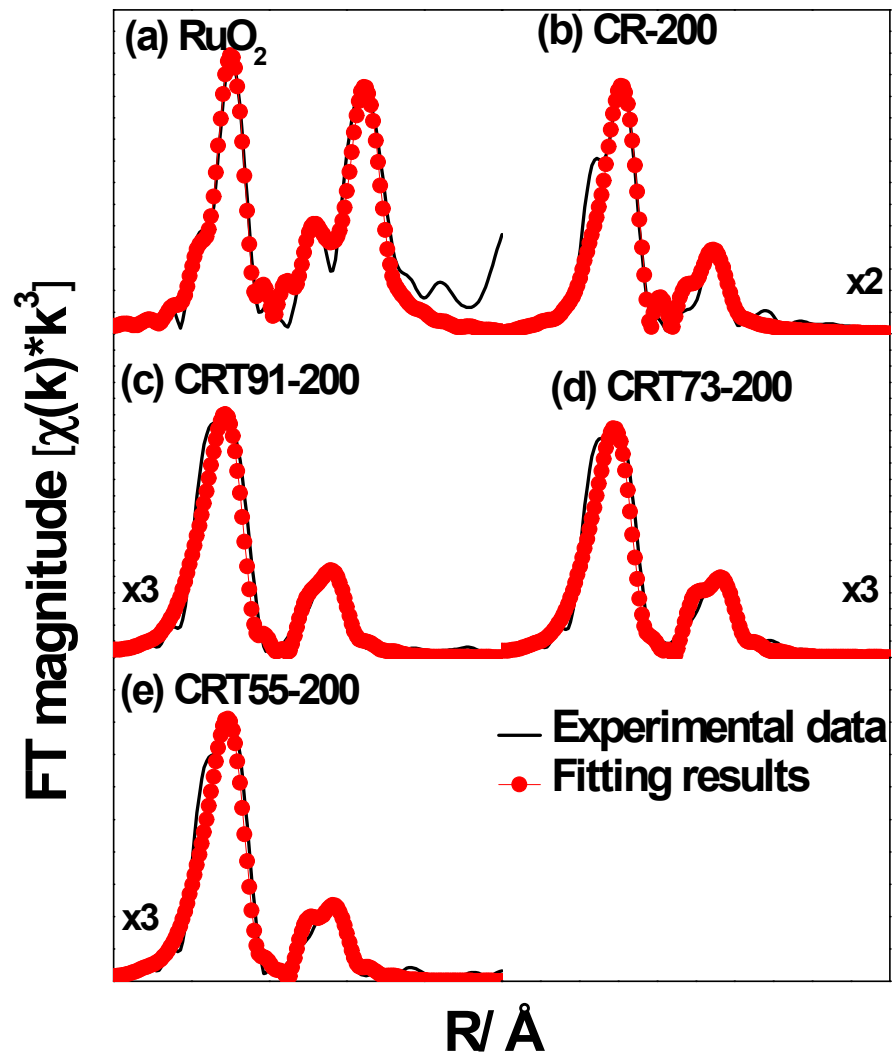

Figure S3 A series of  $k^3$ -weighted Fourier-transformed EXAFS functions at the Ru *K*-edge with their corresponding fits for  $\text{RuO}_2$  together with different Ru-Ti atomic ratios oxides treated at 200°C condition. All spectra presented here are normalized to the same scale (see the multiple factor number) for a clear comparison purpose.

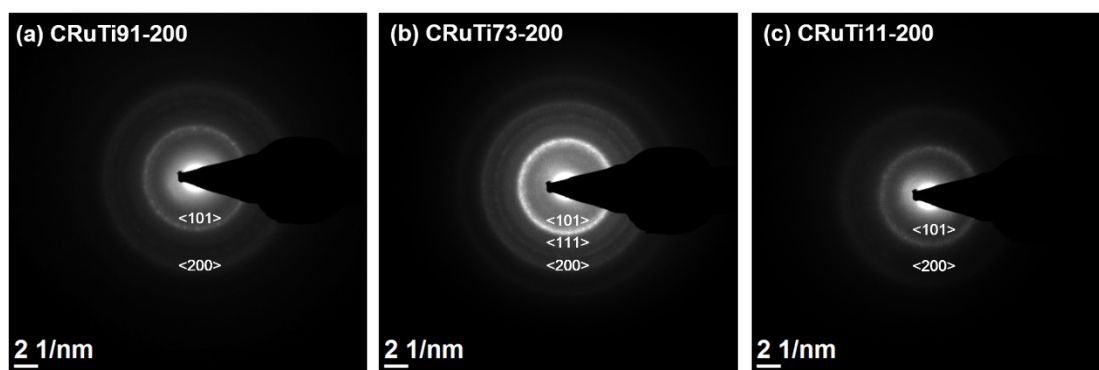

Figure S4 Representative electron diffraction (ED) patterns for three Ru-Ti oxides.

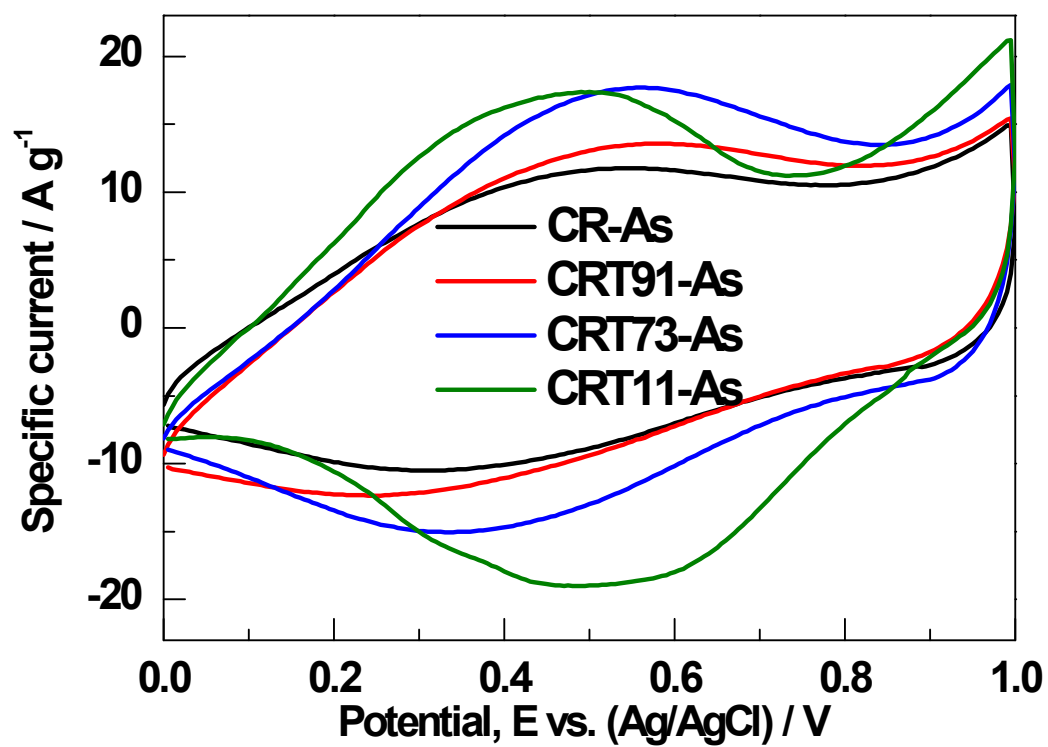

Figure S5 CV curves measured in  $0.5 \text{ M H}_2\text{SO}_4$  at  $25 \text{ mV s}^{-1}$  for CR-As, CRT91-As, CRT73-As, and CRT55-As samples.

Table S1 A comparison of the total specific capacitance and specific capacitance based on  $\text{RuO}_2$  for  $\text{RuO}_2 \cdot n\text{H}_2\text{O}$  and  $\text{Ru}_x\text{-Ti}_{1-x}\text{O}_2 \cdot n\text{H}_2\text{O}$  with and without the thermal treatment at  $200^\circ\text{C}$ .

| Samples                                                                                                                                                  | CR    | CRT91 | CRT73 | CRT55 |
|----------------------------------------------------------------------------------------------------------------------------------------------------------|-------|-------|-------|-------|
| As-prepared                                                                                                                                              | 311.0 | 358.7 | 503.1 | 534.6 |
| Heat treatment at $200^\circ\text{C}$                                                                                                                    | 569.0 | 739.1 | 793.7 | 655.0 |
| Capacitive performance index of specific capacitance is estimated from the CV curves measured in 0.5 M $\text{H}_2\text{SO}_4$ at $25 \text{ mV s}^{-1}$ |       |       |       |       |

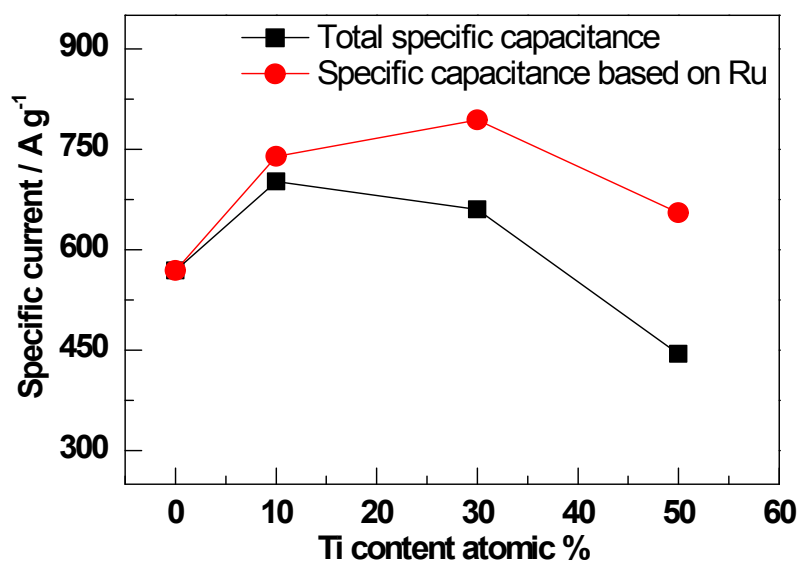

Figure S6 The dependence of total specific capacitance ( $C_{S,T}$ ) and the specific capacitance based on  $\text{RuO}_2$  ( $C_{S,\text{RuO}_2}$ ) for various RuTi oxides on the  $\text{TiO}_2$  content in the samples.
